# Supplementary figures and images for: Intramolecular hole-transfer in protonated anthracene
Source: Royal Society of Chemistry journal article supplement (doi:10.1039/d3cp02922k), 2023-01-01

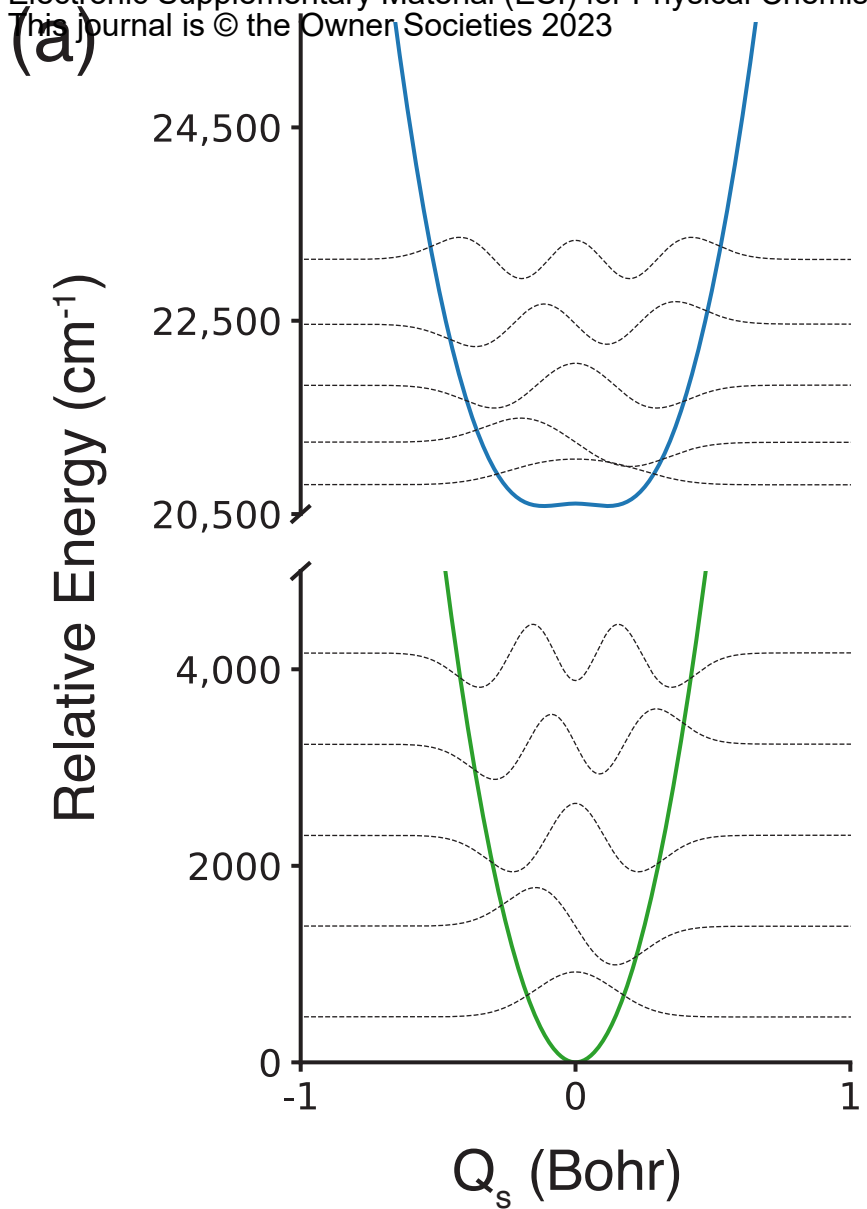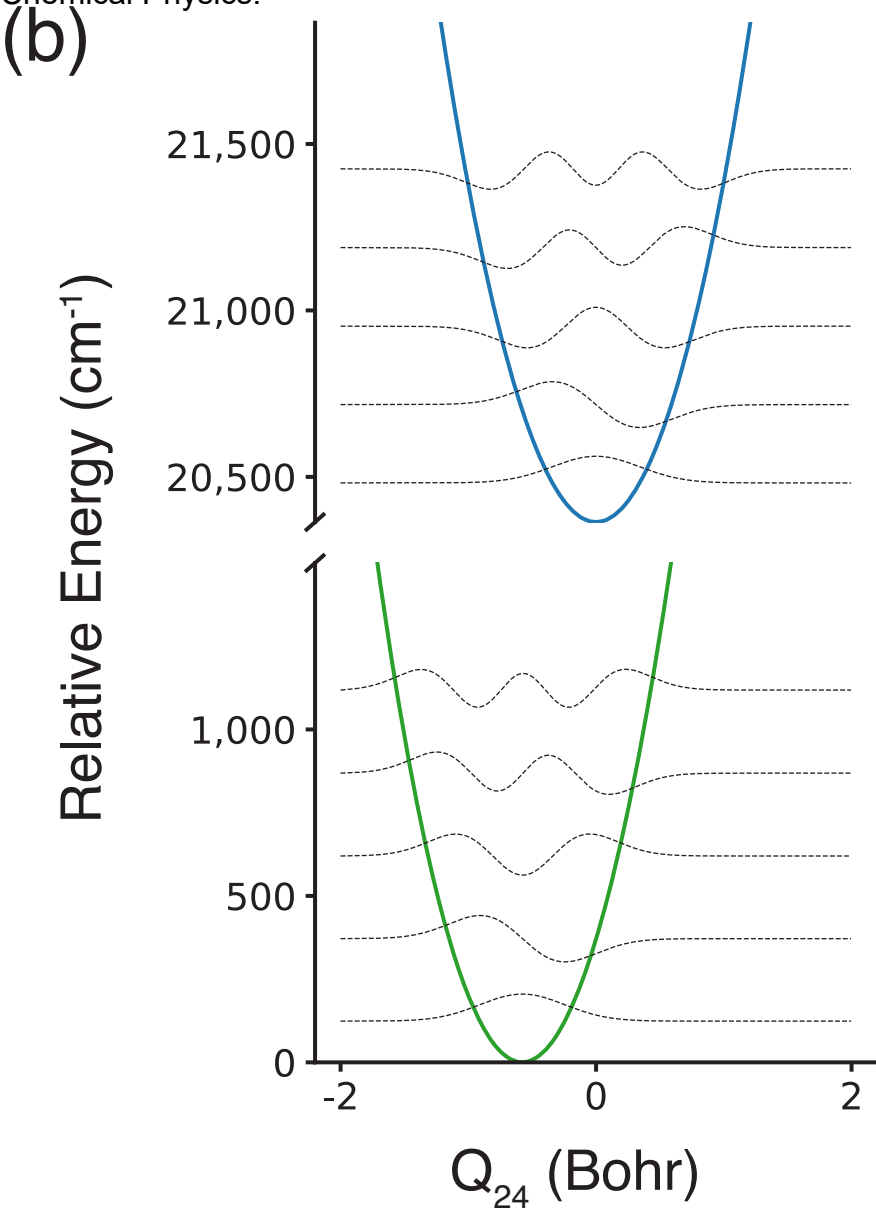

Supplement: d3cp02922k1.pdf [file d3cp02922k1.pdf]

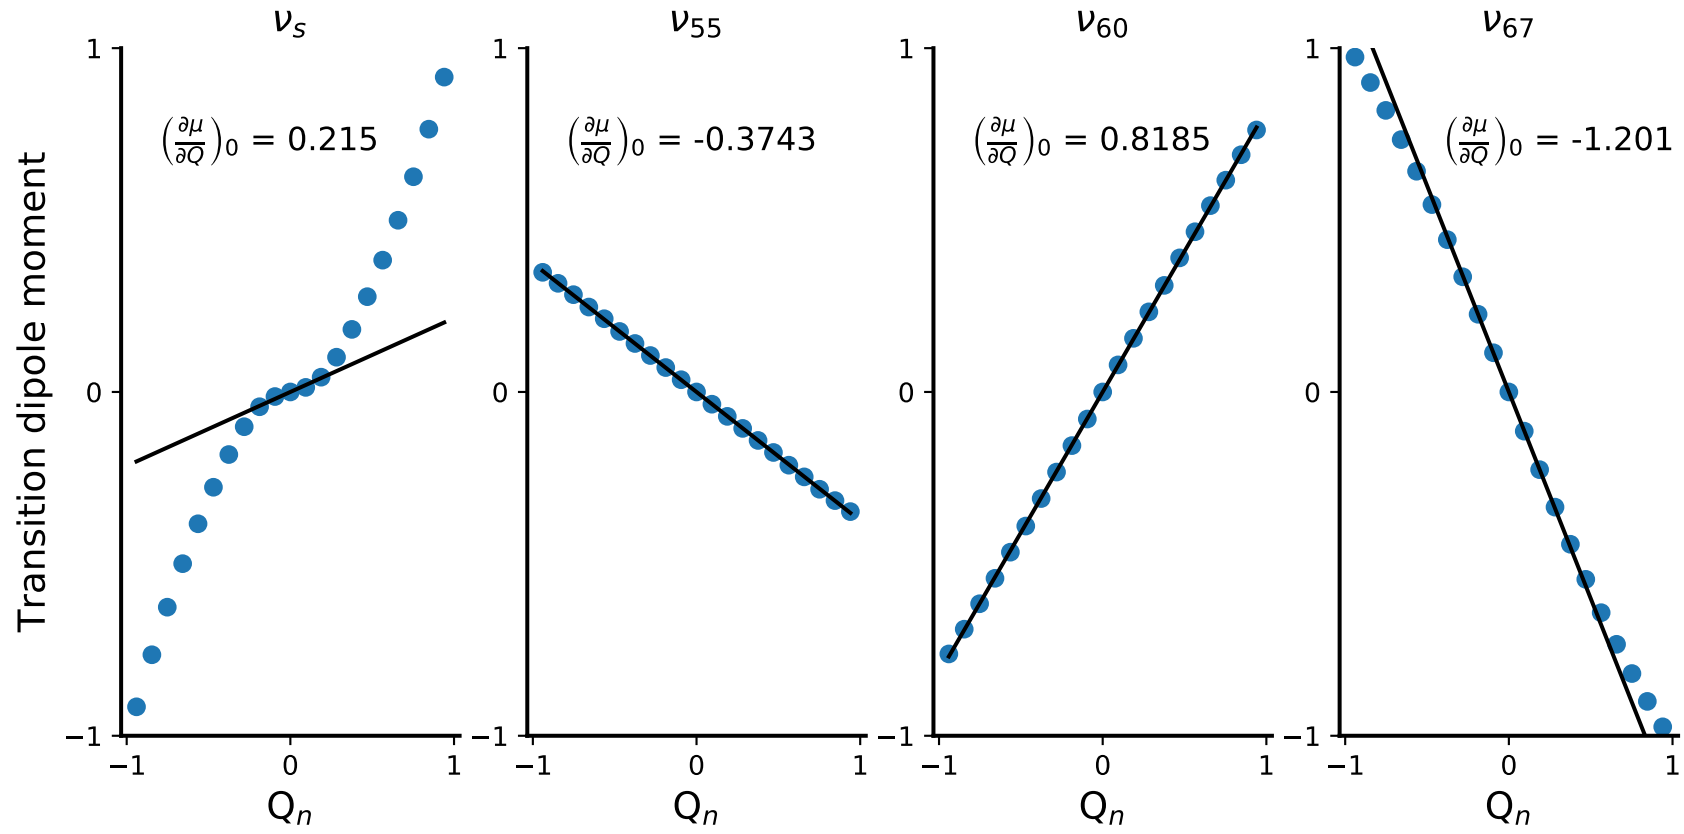

Supplement: d3cp02922k2.pdf [file d3cp02922k2.pdf]
